# Supplementary material
Source: PubMed Central journal article supplement (PMC6003881)

**A**

GFP-peptide CRL  
substrates  
(MLN4924  
positive cells)

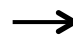

Knockout APPBP2 with  
2 independent sgRNAs;  
sgRNA targeting AAVS1  
as control

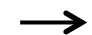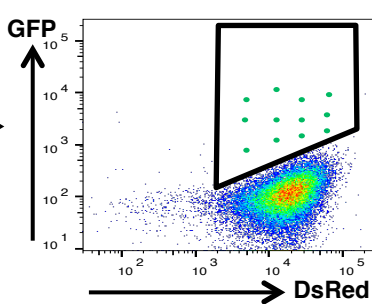

Sort top 5%  
GFP positive  
cells 9 days  
post infection

**B**

PXN (-RHCGRT\*)

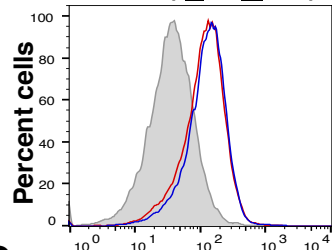

PIK3C2B (-RSHGTL\*)

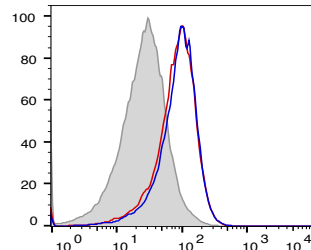

ASCC3 (-RFRGLR\*)

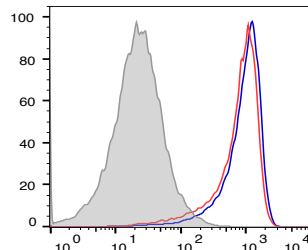

Clone 1 (-RNLGIR\*)

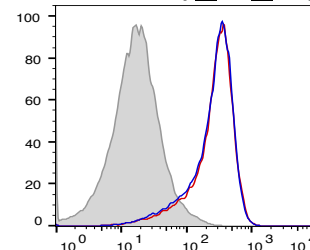

■ + sgAAVS1  
■ + sg1-APPBP2  
■ + sg2-APPBP2

**C**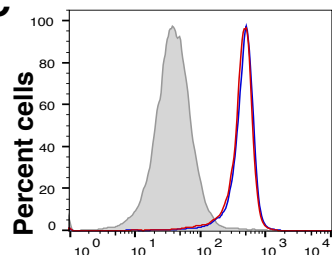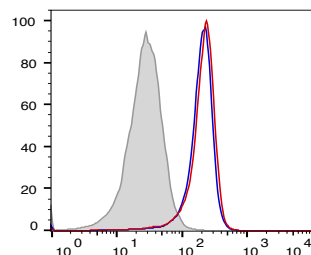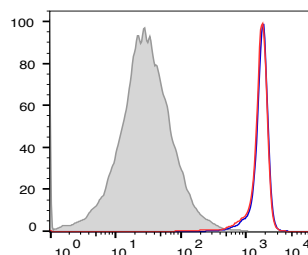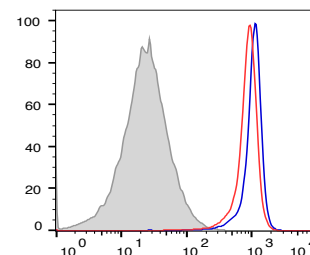

■ Wild-type  
■ Mutant (RxxG/DxxD)  
■ C-terminal extension

Stability

**D**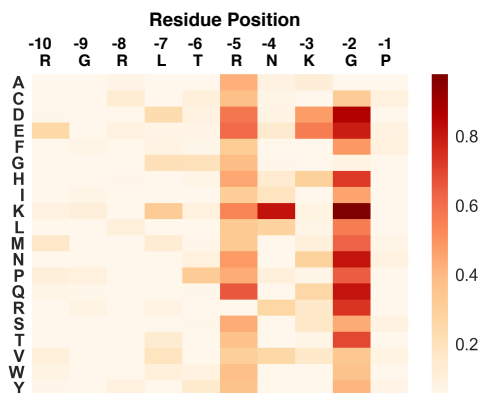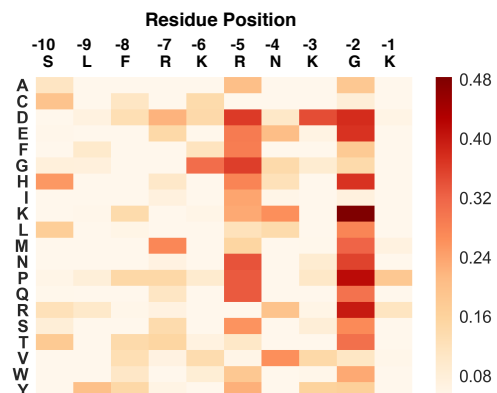

Supplement: NIHMS967427-supplement-5.pdf [file NIHMS967427-supplement-5.pdf]
