# Supplementary material
Source: PubMed Central journal article supplement (PMC6003881)

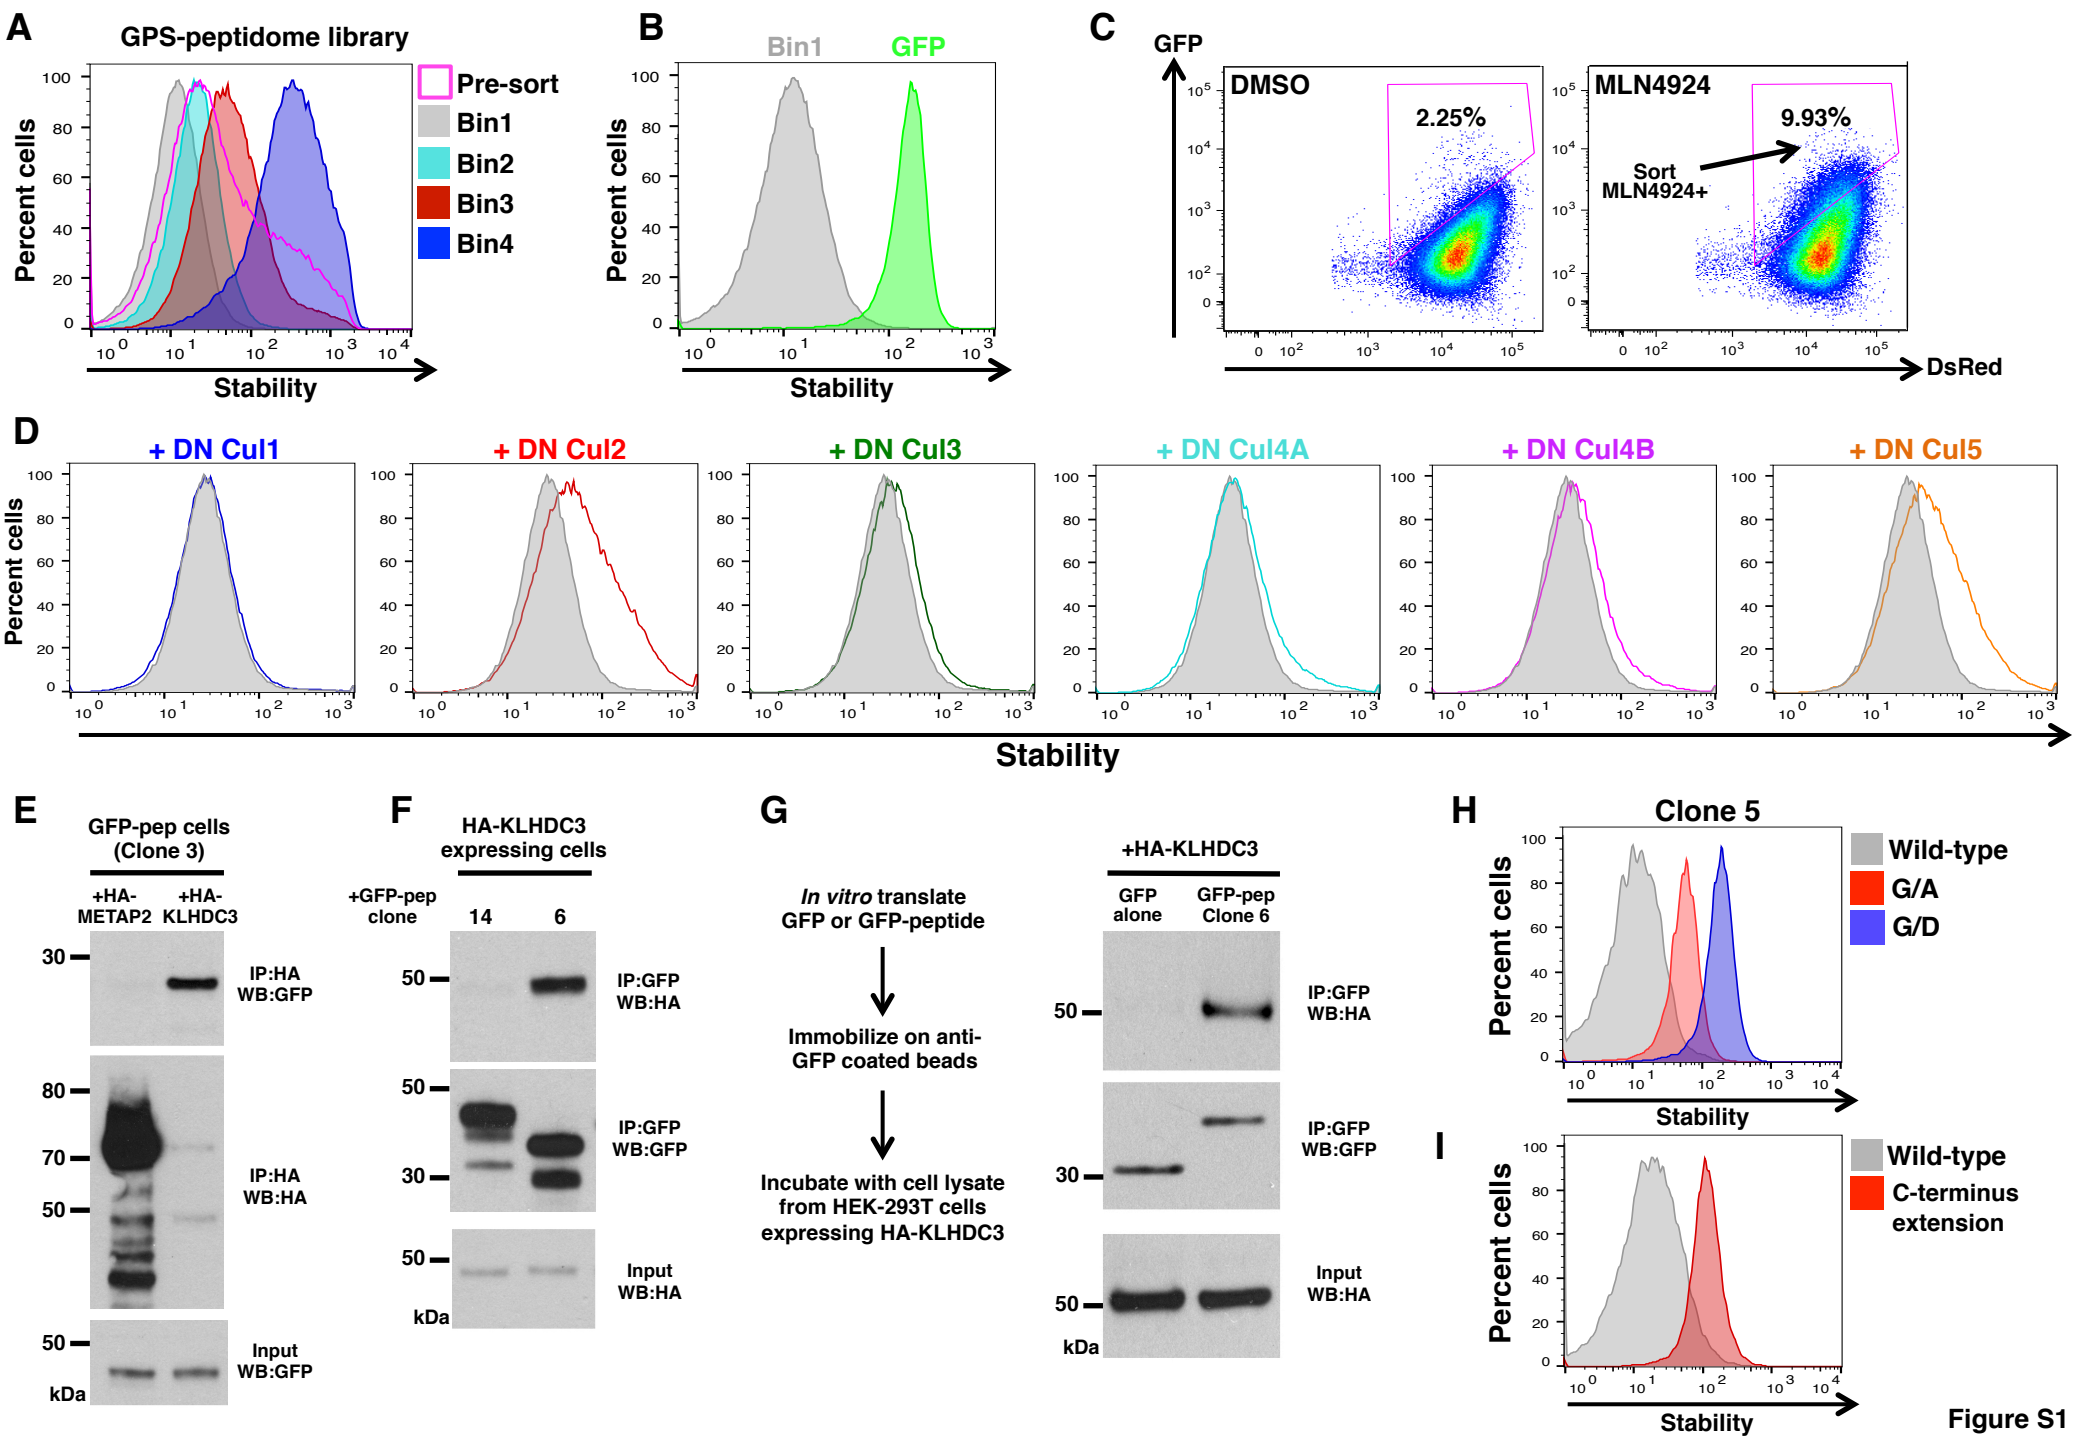

Figure S1

Supplement: NIHMS967427-supplement-1.pdf [file NIHMS967427-supplement-1.pdf]

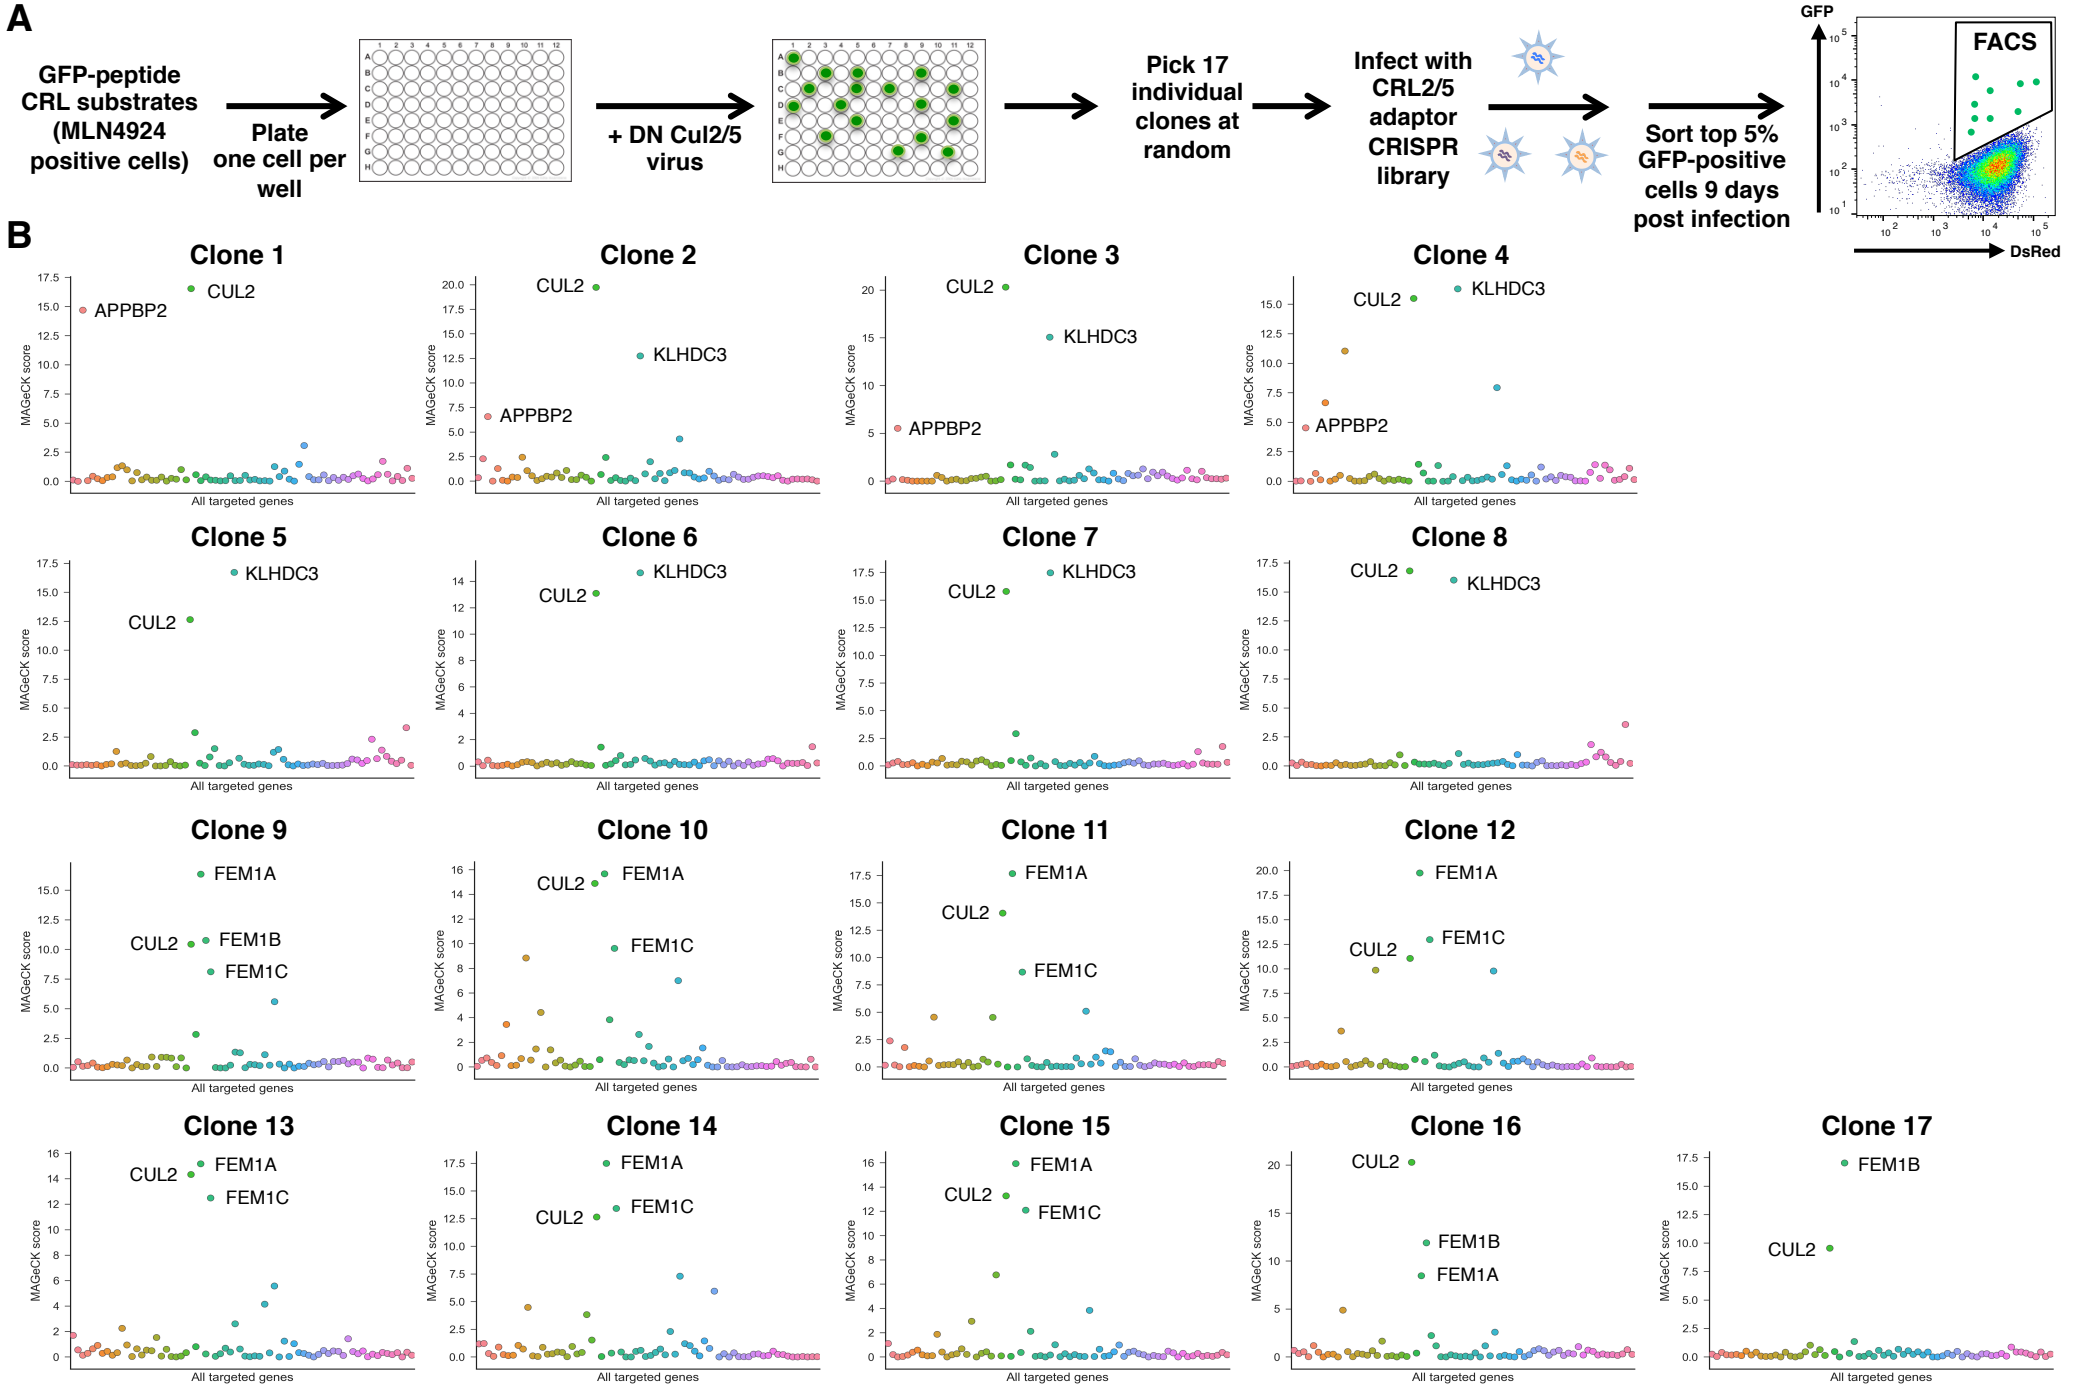

Figure S2

Supplement: NIHMS967427-supplement-2.pdf [file NIHMS967427-supplement-2.pdf]

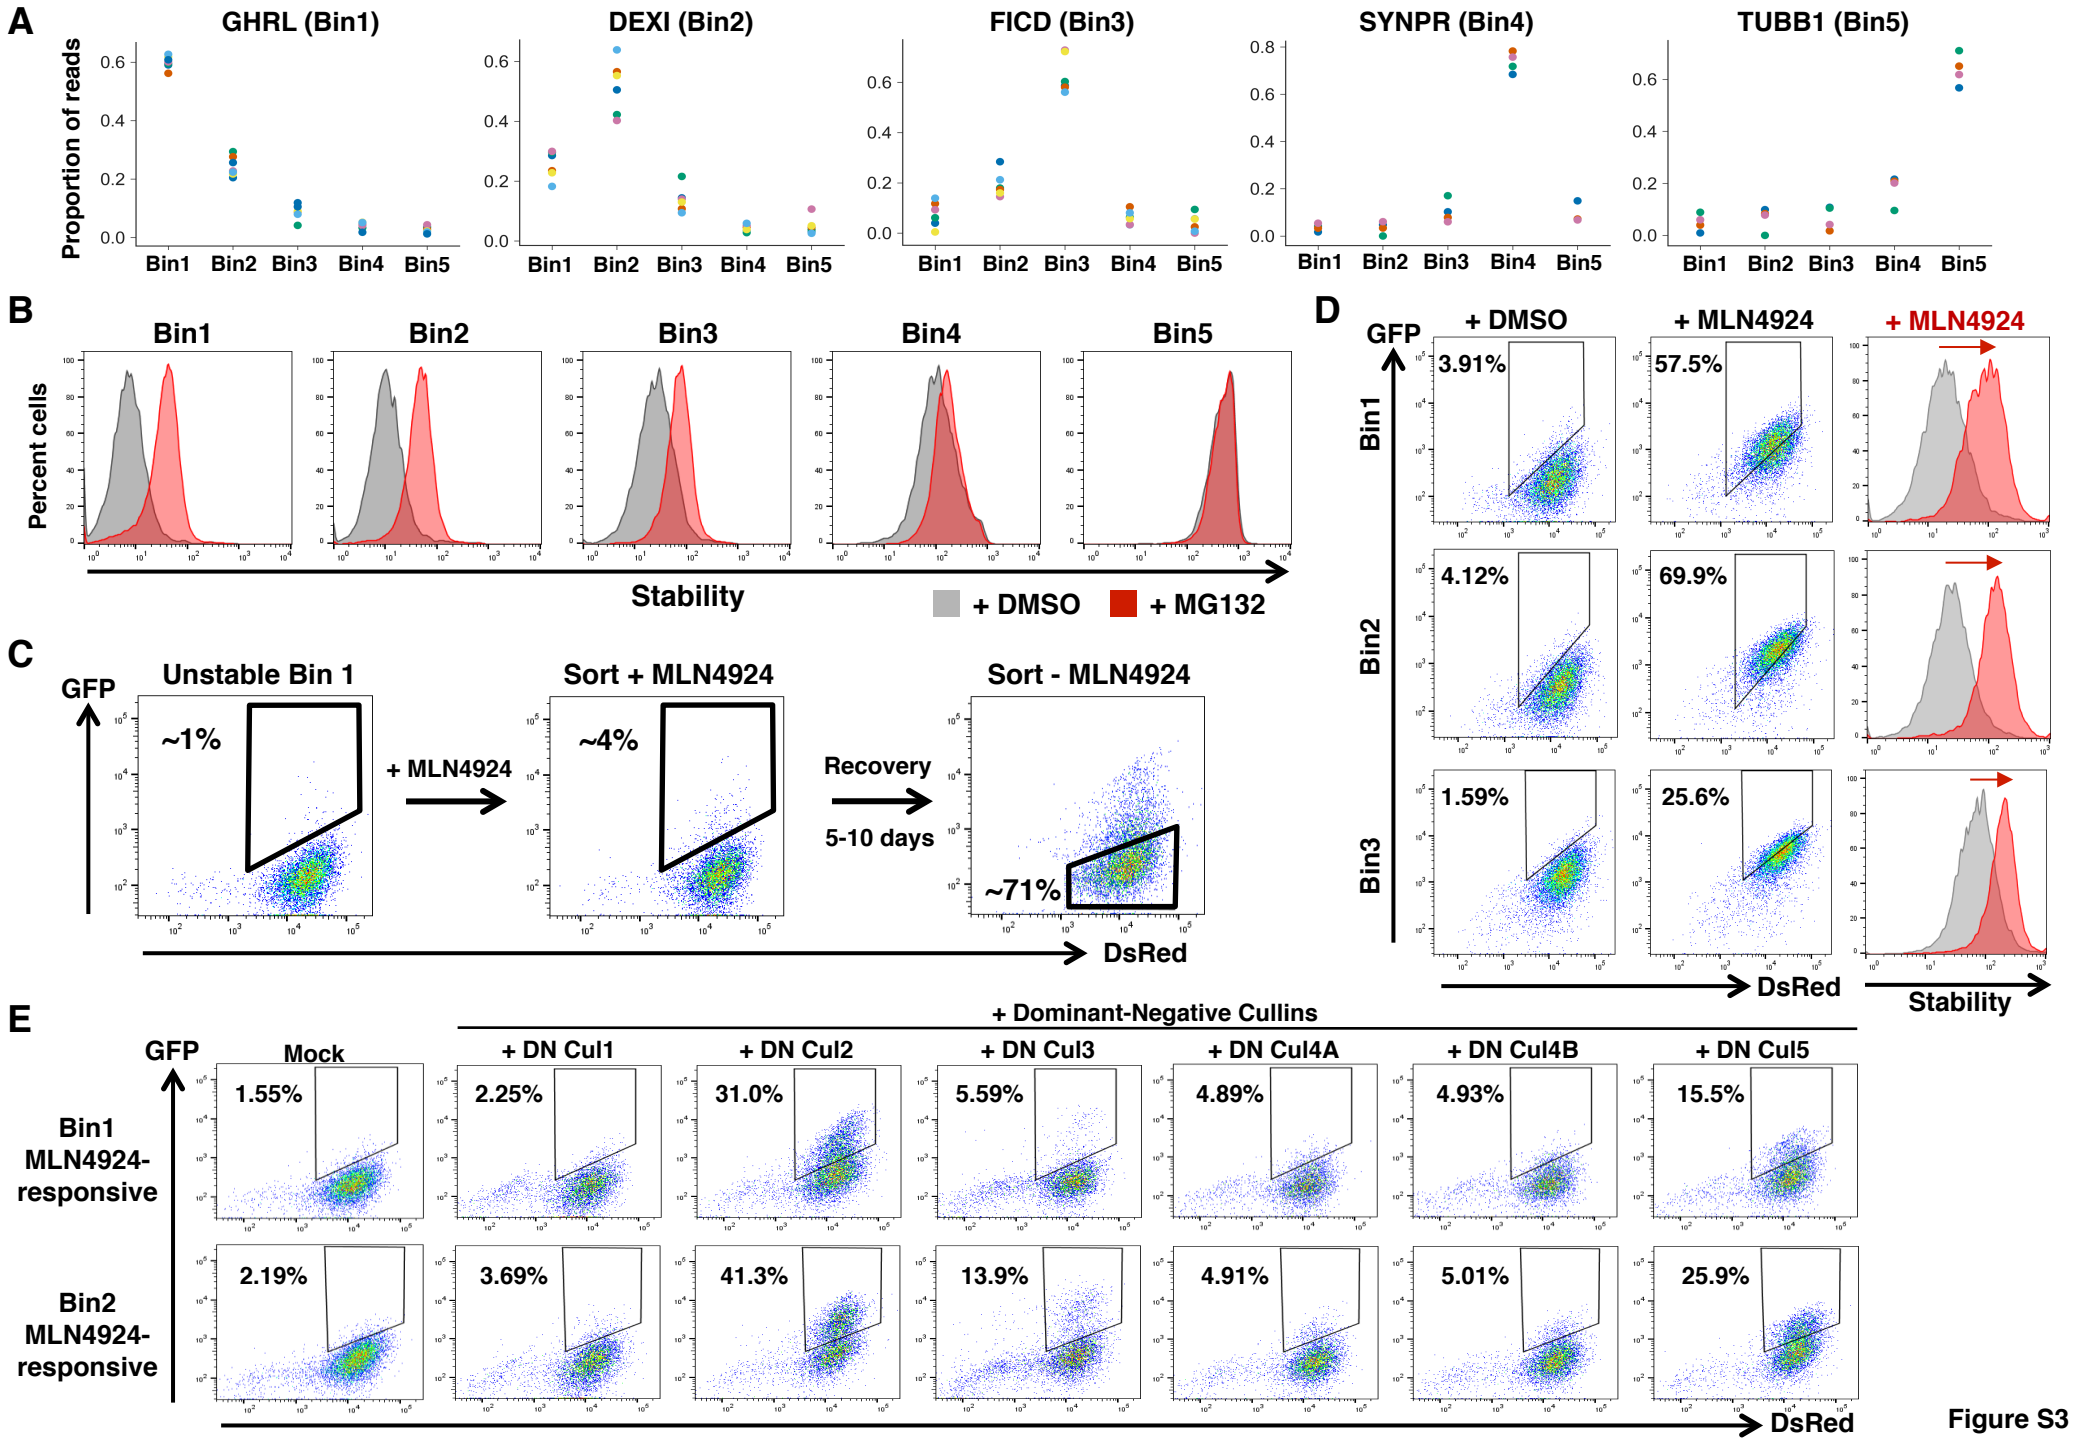

Figure S3

Supplement: NIHMS967427-supplement-3.pdf [file NIHMS967427-supplement-3.pdf]

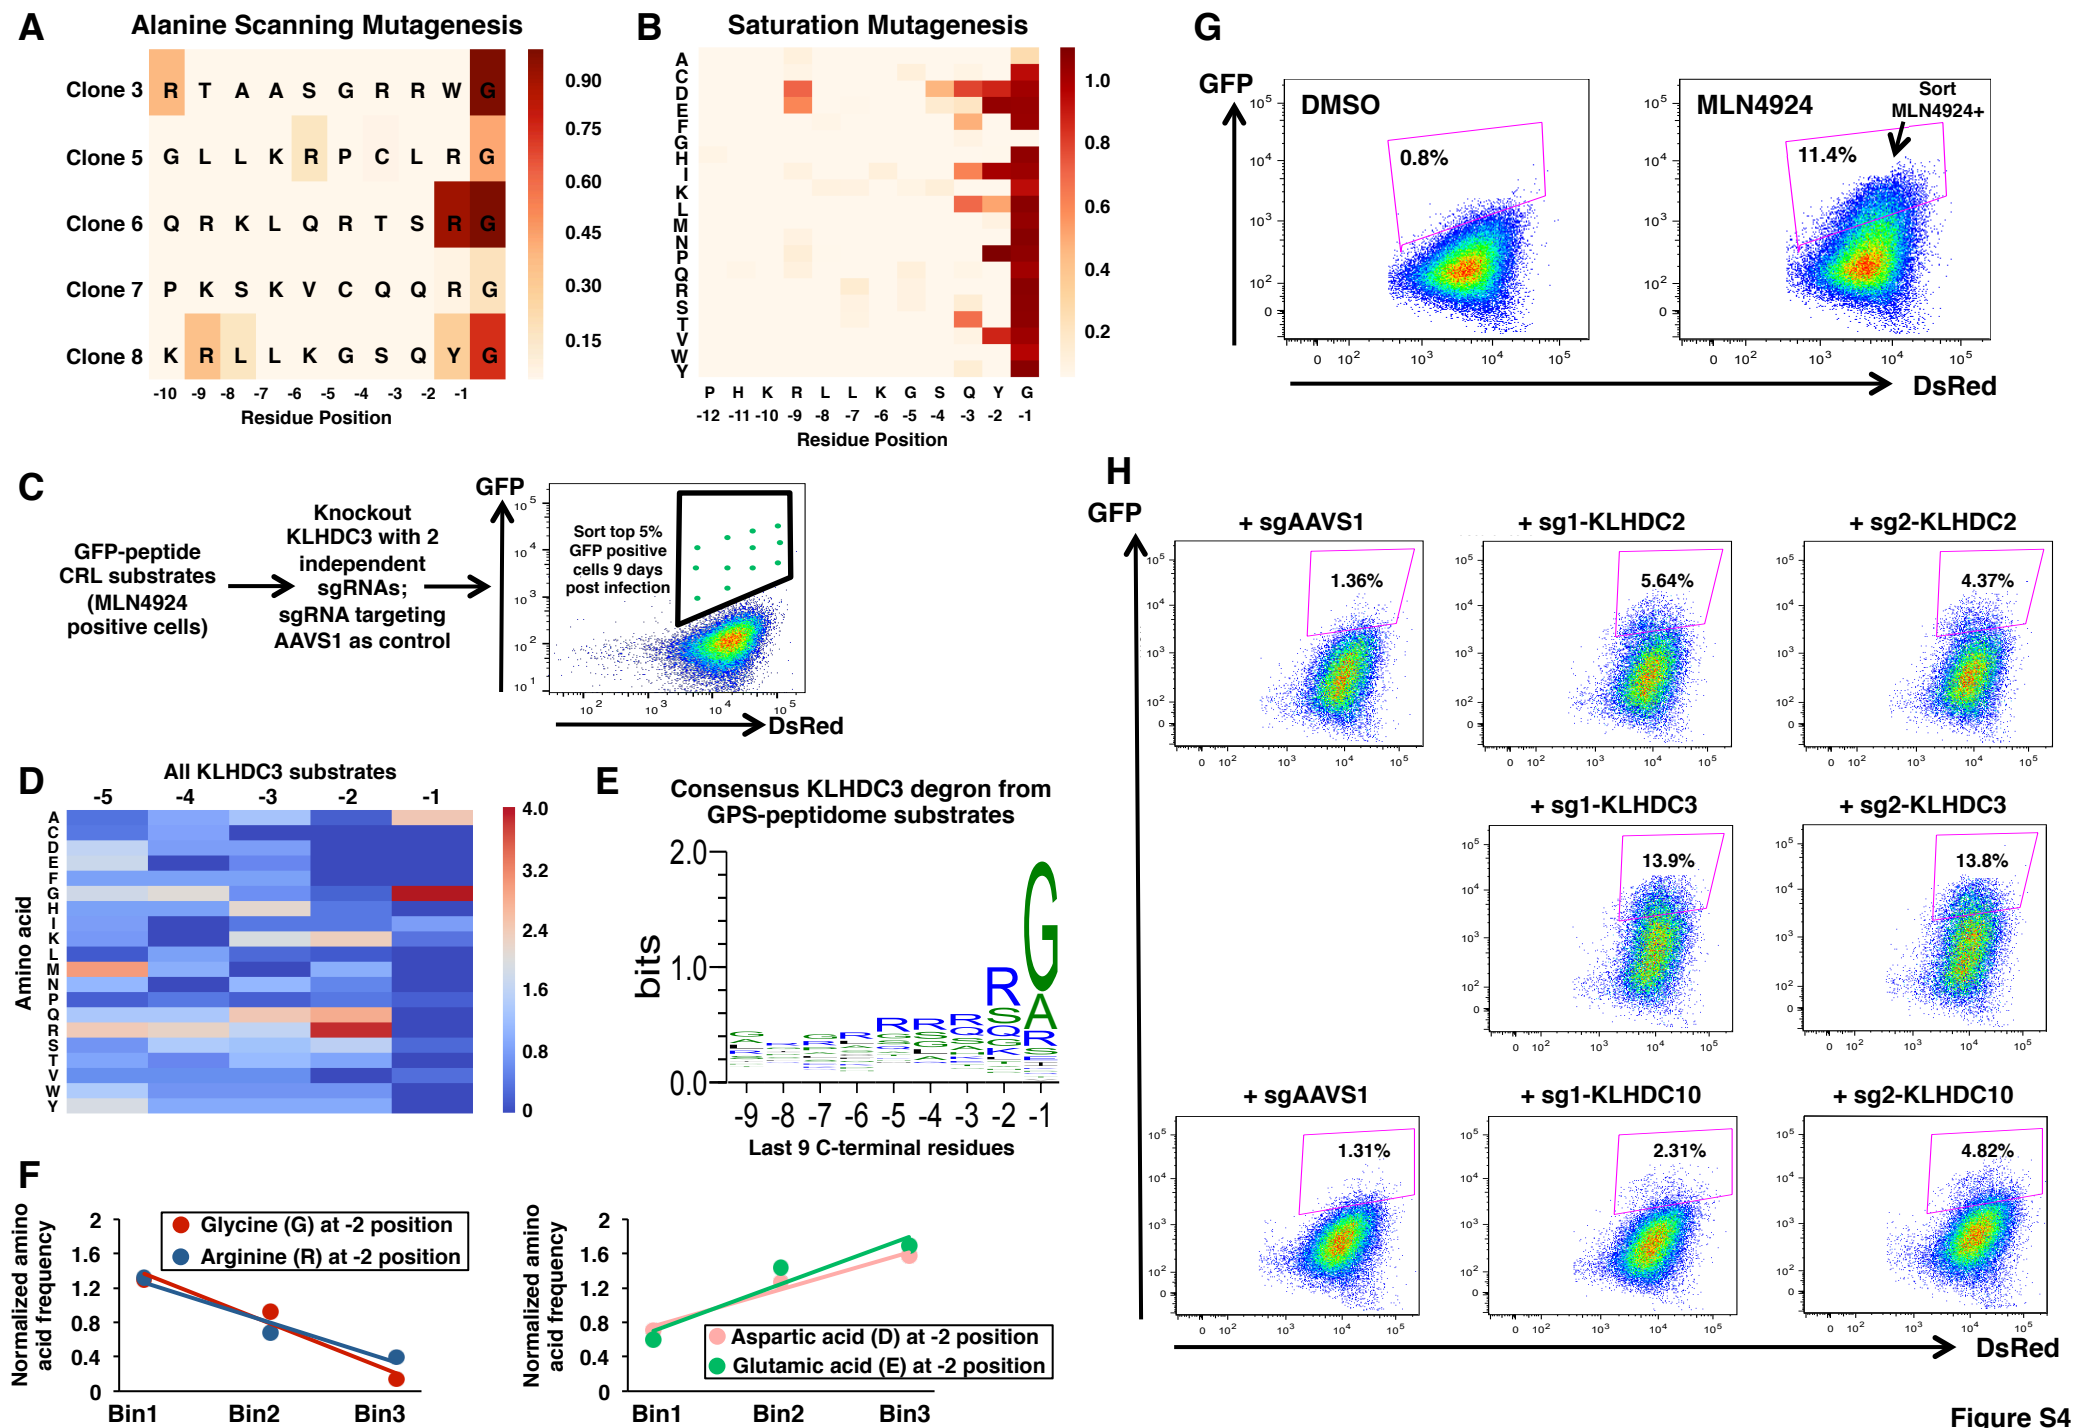

Figure S4

Supplement: NIHMS967427-supplement-4.pdf [file NIHMS967427-supplement-4.pdf]

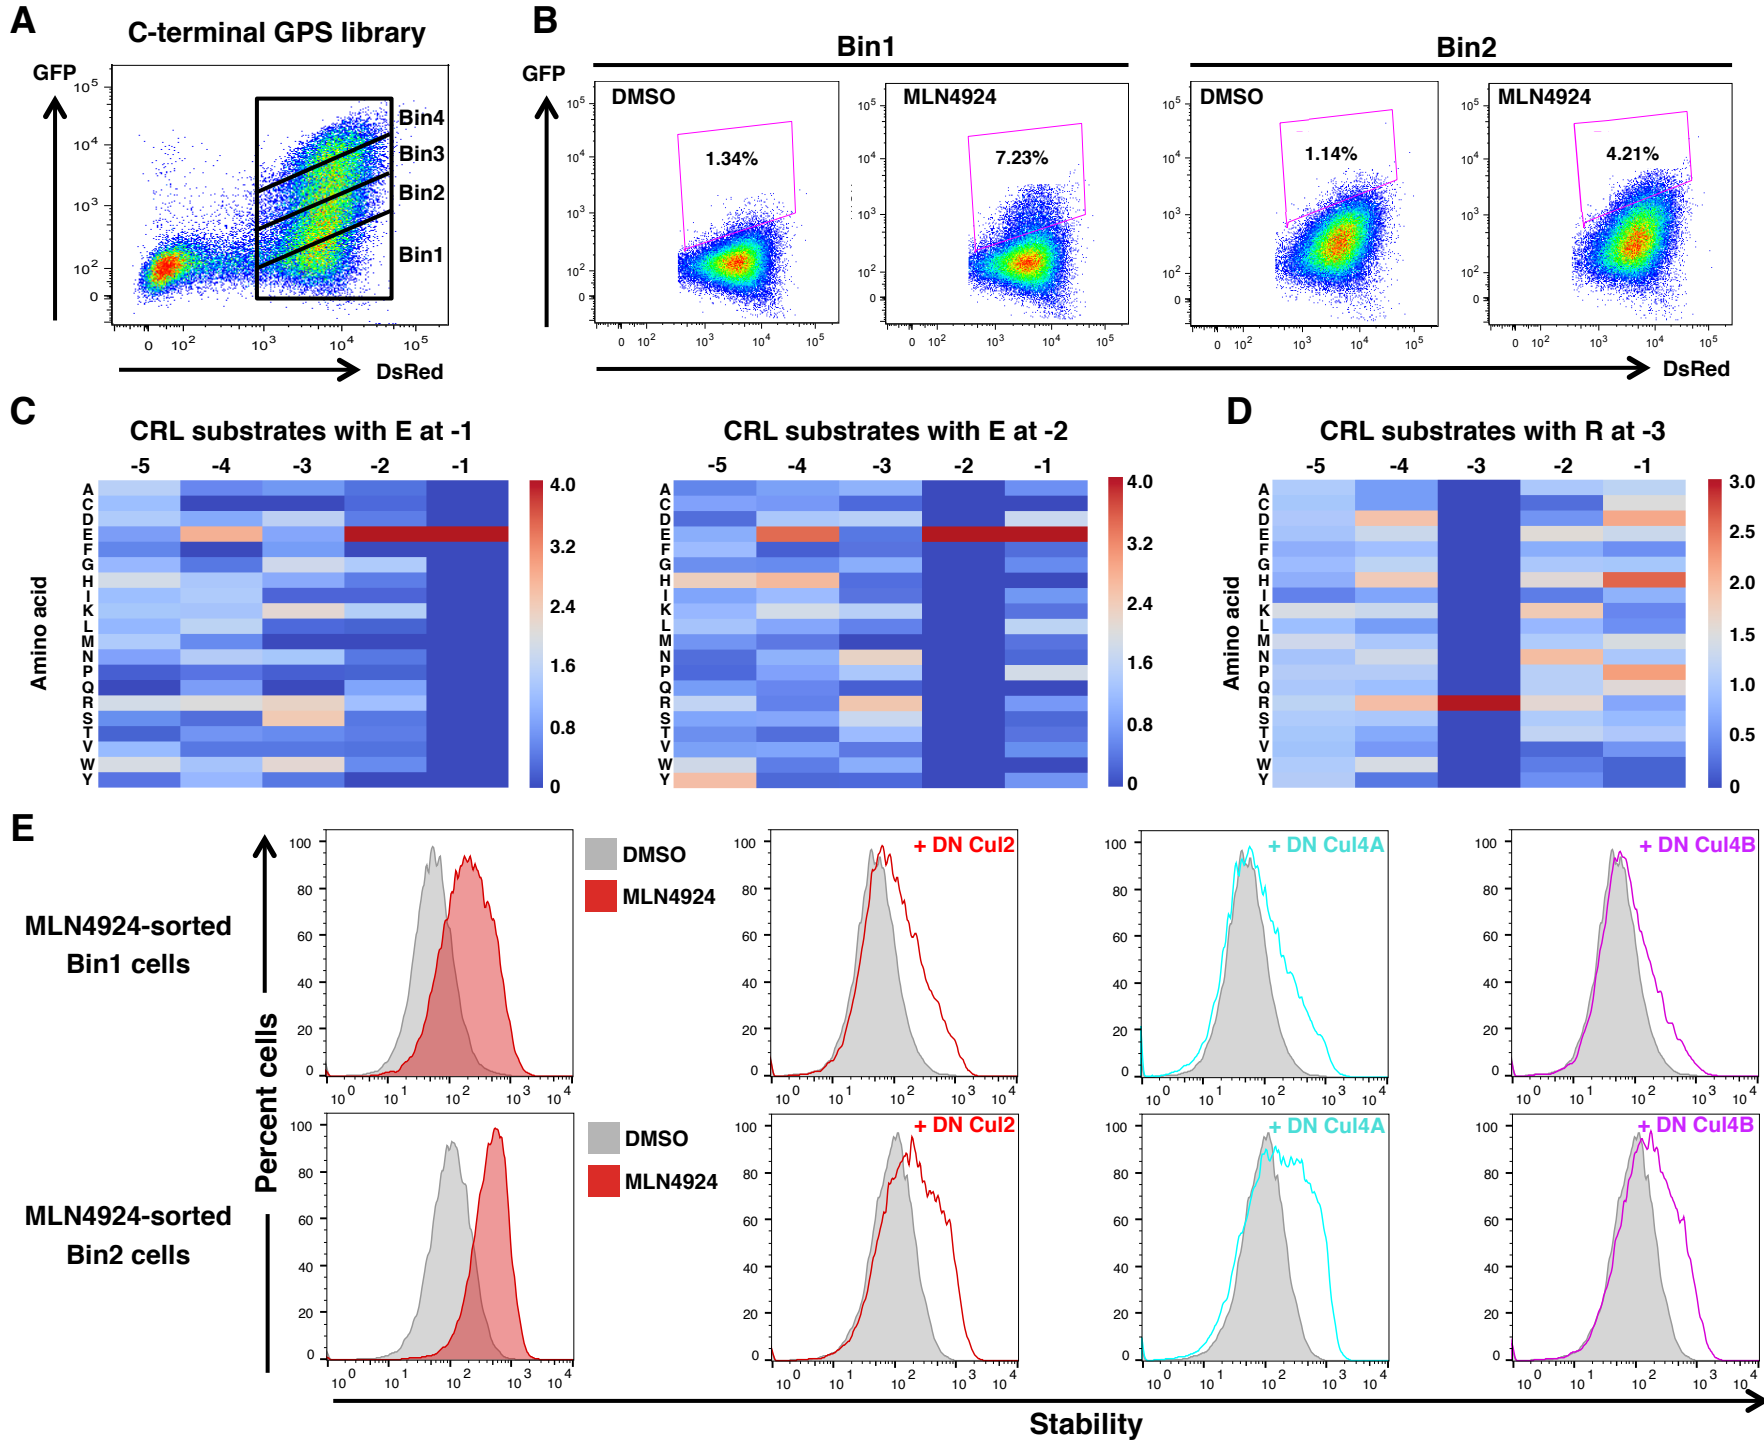

Figure S6

Supplement: NIHMS967427-supplement-6.pdf [file NIHMS967427-supplement-6.pdf]

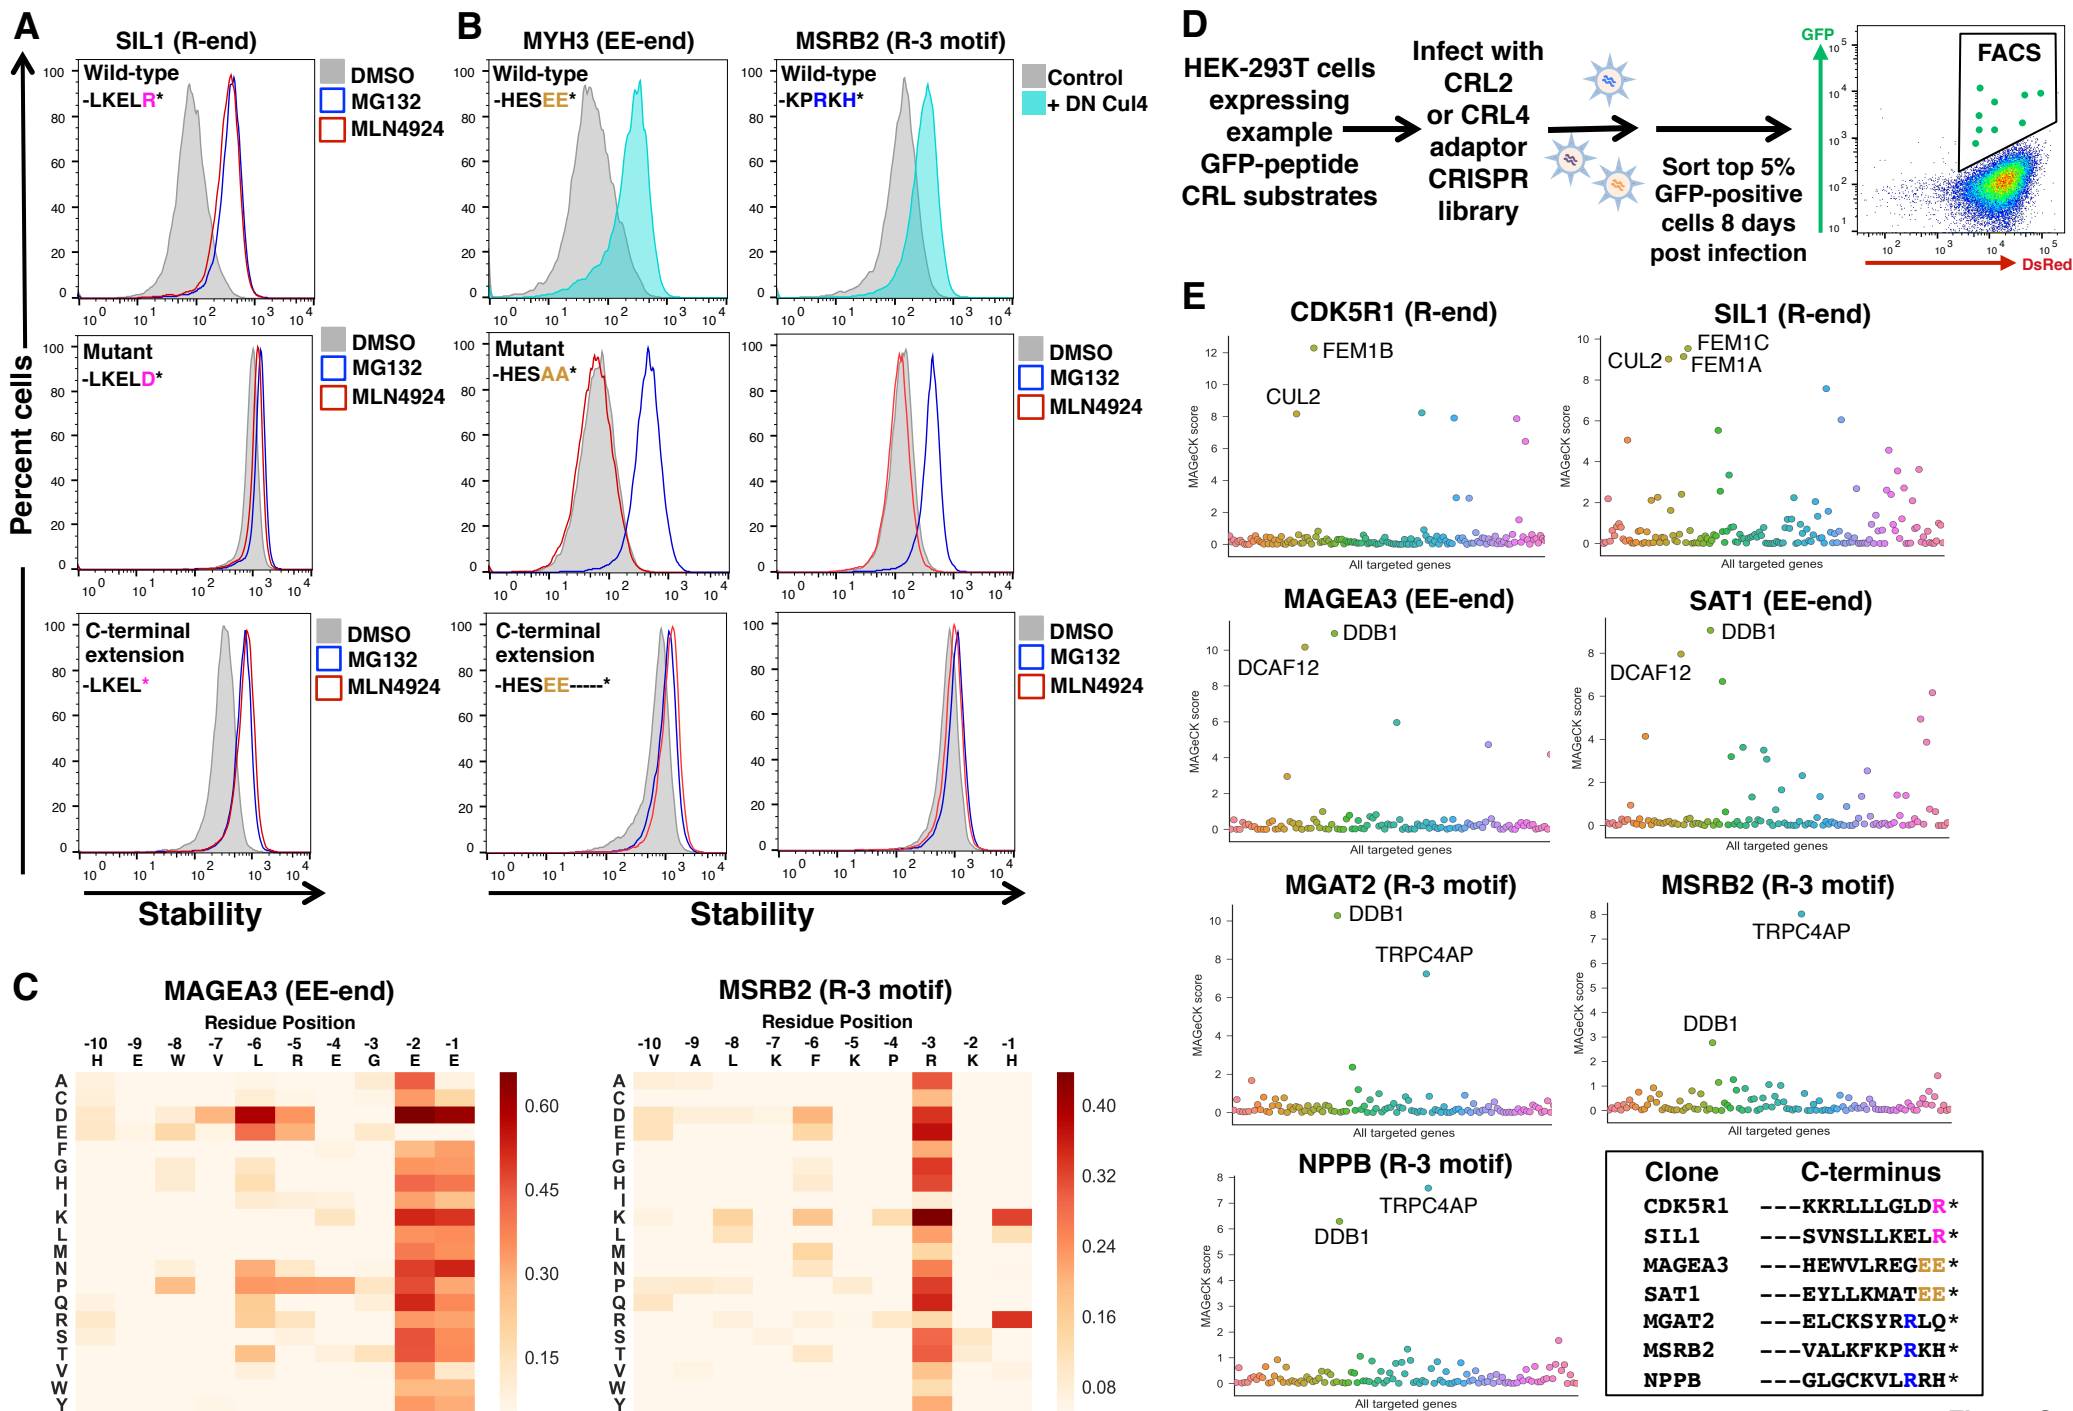

Figure S7

F

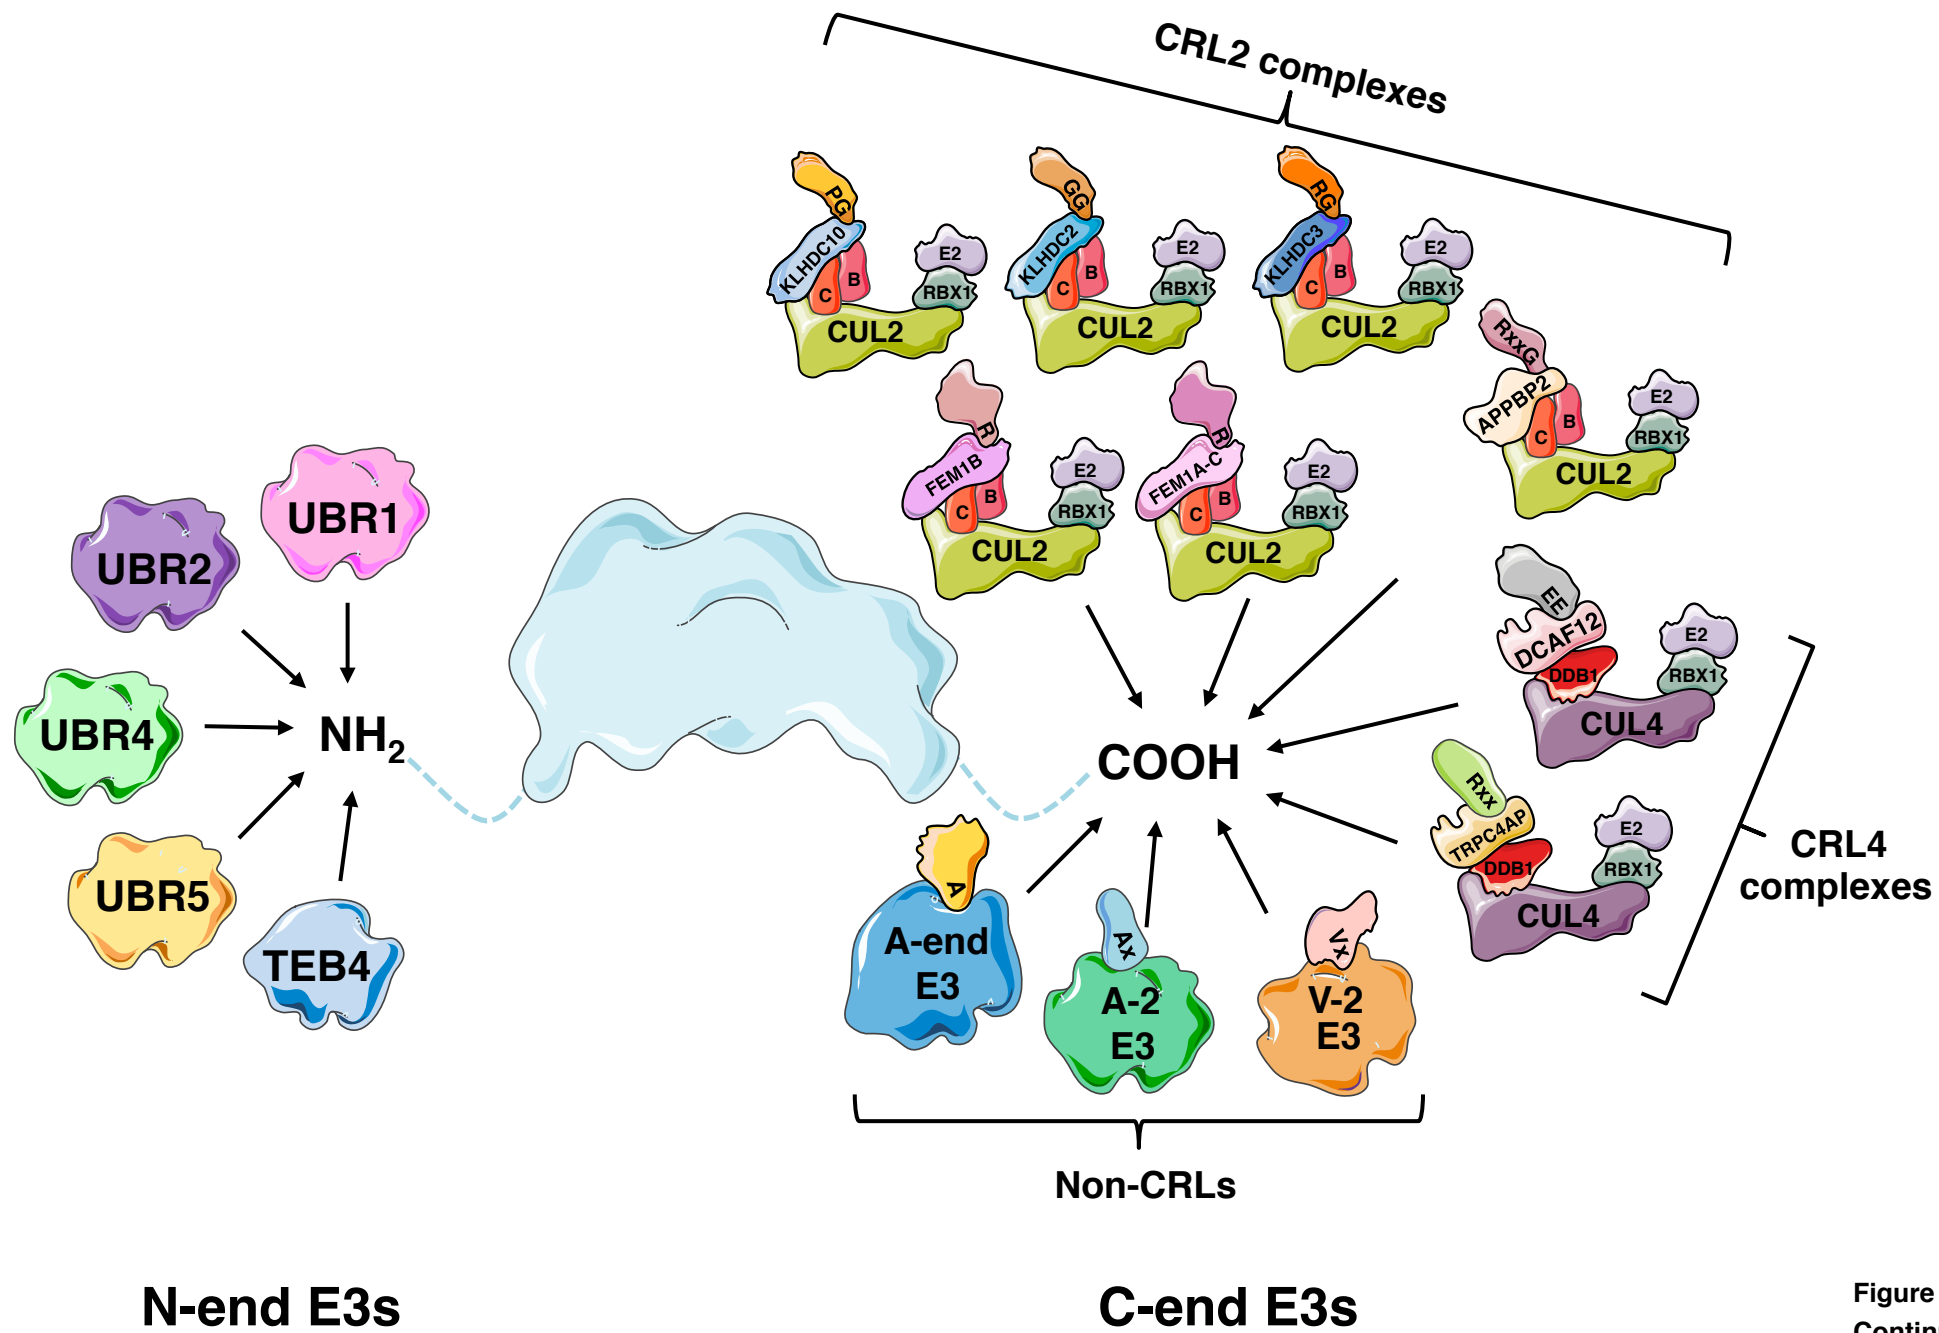

Figure S7  
Continued

Supplement: NIHMS967427-supplement-7.pdf [file NIHMS967427-supplement-7.pdf]
